# Supplementary material for: Effect of cobalt phosphide (CoP) vacancies on its hydrogen evolution activity via water splitting: a theoretical study
Source: Royal Society of Chemistry journal article supplement (doi:10.1039/d1cp05739a), 2022-01-01
Supplement: d1cp05739a1.pdf [file d1cp05739a1.pdf]

## Supporting Information for publication

### Effect of cobalt phosphide (CoP) vacancies on its hydrogen evolution activity via water splitting: A theoretical study†

Xiaofei Cao<sup>a</sup>, Yuan Tan<sup>a</sup>, Huaan Zhen<sup>a</sup>, Jun Hu<sup>a\*</sup>, Xi Chen<sup>b\*</sup>, Zhong Chen<sup>c\*</sup>

<sup>a</sup> School of Chemical Engineering, Northwest University, Xi'an, P. R. China 710069;

<sup>b</sup> Earth Engineering Center, Center for Advanced Materials for Energy and Environment, Department of Earth and Environmental Engineering, Columbia University, New York NY10027, USA;

<sup>c</sup> School of Materials Science and Engineering, Nanyang Technological University, 50 Nanyang Avenue, Singapore 639798

**Table S1.** Optimized crystallographic parameters of CoP compared to experimental data. The atomic fractional coordinates of all atoms and the bond lengths are also presented.

|                                                                   | Crystallographic parameters |              |              |             | Atomic fractional coordinates |                         | Bond length/<br>Å                                   |
|-------------------------------------------------------------------|-----------------------------|--------------|--------------|-------------|-------------------------------|-------------------------|-----------------------------------------------------|
|                                                                   | <i>A</i> (Å)                | <i>b</i> (Å) | <i>c</i> (Å) | $\beta$ (°) | Co                            | P                       | Co-P/ Å                                             |
| This work                                                         | 3.24<br>2                   | 5.03<br>2    | 5.48<br>0    | 90.0<br>0   | (0.250,0.5<br>04,0.695)       | (0.250,0.6<br>89,0.82)  | 2.315×2<br>2.326×2<br>2.327×2<br>2.196×2<br>2.247×2 |
| Powder<br>X-ray<br>diffraction<br>(295K) <sup>S1,<br/>S2,S3</sup> | 3.28<br>1                   | 5.07<br>7    | 5.58<br>7    | 90.0<br>0   | (0.250,0.5<br>01,0.696)       | (0.250,0.6<br>91,0.082) | 2.348×4<br>2.347×2<br>2.206×2<br>2.267×2            |

As shown in Table S1, the simulated crystallographic parameters of the optimized orthorhombic CoP agree well with the experimental results from powder X-ray diffraction.

**Table S2.** Data on surface energies of different low-index surfaces. The optimization is carried out until the energy, maximum force, maximum stress, and maximum displacement are smaller than  $5.0 \times 10^{-6}$  eV/atom, 0.01 eV/Å, 0.02 GPa, and  $5.0 \times 10^{-4}$  Å, respectively. The energy cutoff is 330 eV and the SCF tolerance is  $5.0 \times 10^{-7}$  eV/atom.

| Surface | $E_{\text{slab}}(\text{eV})$ | Number                           | Surface area(Å <sup>2</sup> ) | Surface energies (J·m <sup>-2</sup> ) |
|---------|------------------------------|----------------------------------|-------------------------------|---------------------------------------|
| (100)   | -12241.427                   | Co <sub>10</sub> P <sub>10</sub> | 28.177                        | 2.497                                 |
| (010)A  | -14686.175                   | Co <sub>12</sub> P <sub>12</sub> | 36.320                        | 3.105                                 |
| (010)B  | -14683.680                   | Co <sub>12</sub> P <sub>12</sub> | 36.320                        | 3.655                                 |
| (001)A  | -24486.326                   | Co <sub>20</sub> P <sub>20</sub> | 33.163                        | 3.404                                 |
| (001)B  | -24486.326                   | Co <sub>20</sub> P <sub>20</sub> | 33.163                        | 3.404                                 |
| (110)A  | -17139.284                   | Co <sub>14</sub> P <sub>14</sub> | 33.522                        | 2.631                                 |
| (110)B  | -17138.771                   | Co <sub>14</sub> P <sub>14</sub> | 33.522                        | 2.754                                 |
| (101)A  | -9787.131                    | Co <sub>8</sub> P <sub>8</sub>   | 32.697                        | 3.194                                 |
| (101)B  | -19529.001                   | Co <sub>16</sub> P <sub>16</sub> | 32.697                        | 2.042                                 |
| (011)A  | -19586.207                   | Co <sub>16</sub> P <sub>16</sub> | 49.182                        | 2.301                                 |
| (011)B  | -29384.984                   | Co <sub>24</sub> P <sub>24</sub> | 49.182                        | 2.528                                 |
| (111)A  | -14689.005                   | Co <sub>12</sub> P <sub>12</sub> | 38.896                        | 2.316                                 |
| (111)B  | -17138.449                   | Co <sub>14</sub> P <sub>14</sub> | 38.896                        | 2.439                                 |
| (111)C  | -26938.039                   | Co <sub>22</sub> P <sub>22</sub> | 38.896                        | 2.559                                 |

As shown in table S2, the (101)B facet has the lowest surface energy among all low-index surfaces of CoP. Usually, the lower surface energy indicates the more stable surface. The experiment also proved that the (101) surface is easily exposed facet<sup>[S4]</sup>, therefore, (101)B is selected to do calculation for its high stability and easily exposed characteristics.

**Table S3.** Data about calculated adsorption energies of CoP (101)B surface and CoP (101)B surfaces with Co<sub>vac</sub> and P<sub>vac</sub>.

| Adsorption        | Surface                       | $E_{\text{molecule+surface}}(\text{eV})$ | $E_{\text{molecule}}(\text{eV})$ | $E_{\text{surface}}(\text{eV})$ | $E_{\text{ads}}(\text{eV})$ |
|-------------------|-------------------------------|------------------------------------------|----------------------------------|---------------------------------|-----------------------------|
|                   | (101)B                        | -20061.208                               | -468.713                         | -19592.001                      | -0.267                      |
| H <sub>2</sub> O* | (101)B with Co <sub>vac</sub> | -19016.435                               | -468.713                         | -18546.489                      | -1.233                      |
|                   | (101)B with P <sub>vac</sub>  | -19879.871                               | -468.713                         | -19410.183                      | -0.978                      |
| H*                | (101)B                        | -19608.128                               | -32.418                          | 19592.001                       | 0.081                       |
|                   | (101)B with Co <sub>vac</sub> | -18562.808                               | -32.418                          | -18546.489                      | -0.111                      |
|                   | (101)B with P <sub>vac</sub>  | -19426.633                               | -32.418                          | -19410.183                      | -0.241                      |
| OH*               | (101)B                        | -20045.008                               | -449.926                         | 19592.001                       | -3.071                      |
|                   | (101)B with Co <sub>vac</sub> | -19000.391                               | -449.926                         | -18546.489                      | -3.966                      |
|                   | (101)B with P <sub>vac</sub>  | -19863.655                               | -449.926                         | -19410.183                      | -3.536                      |

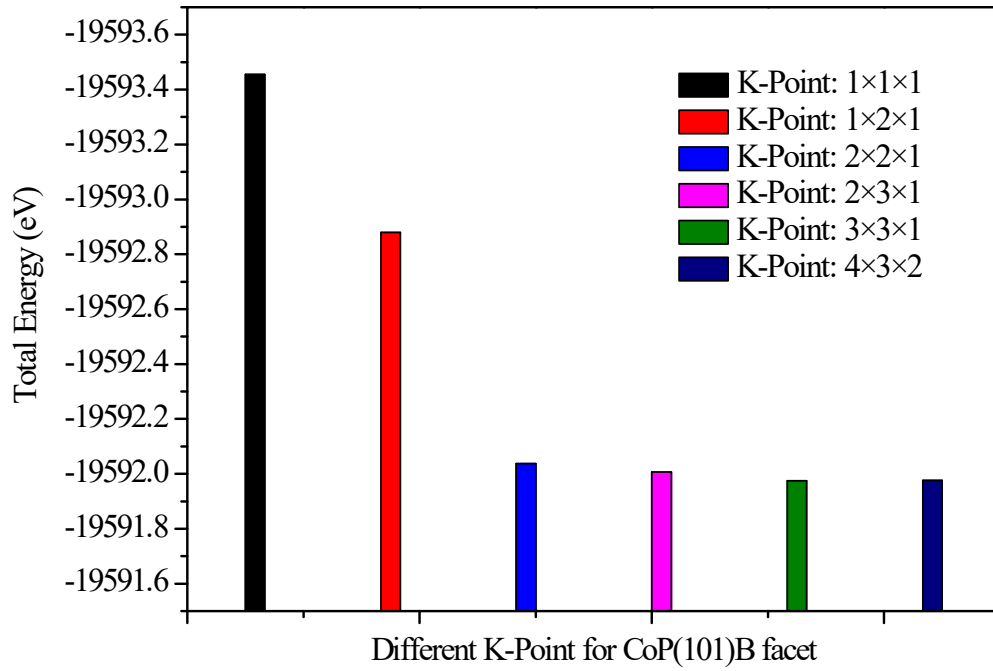

**Fig. S1** The variation trend of the total energy under different K point settings.

From Fig. S1, it can be found that the total energy exists large fluctuations when the K-Point setting are rough. When the K-Point was set as  $2 \times 3 \times 1$  and more precise, the total energy no longer changes significantly. Thus, our K-Point set as  $2 \times 3 \times 1$  is reasonable.

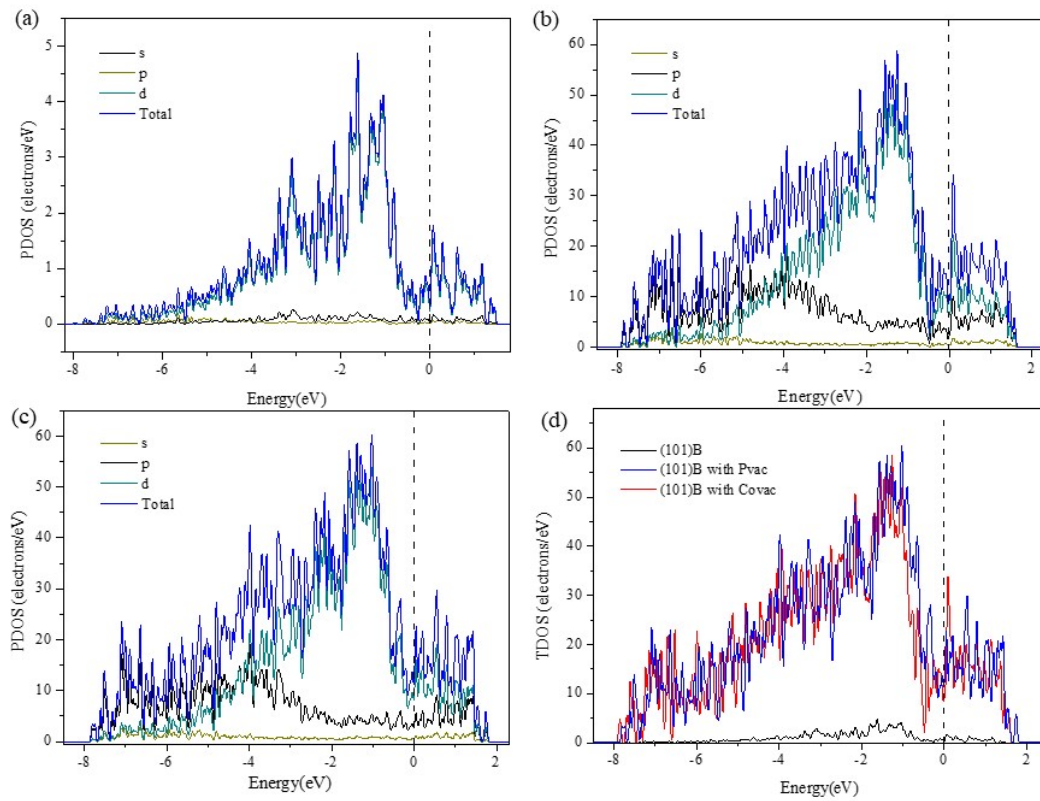

**Fig. S2** (a)-(c) calculated partial density of states (DOS) for CoP(101)B, CoP(101)B with  $\text{Co}_{\text{vac}}$

and CoP(101)B with  $P_{vac}$ . (d) the total density of states (DOS) for CoP(101)B, CoP(101)B with  $Co_{vac}$  and  $P_{vac}$ .

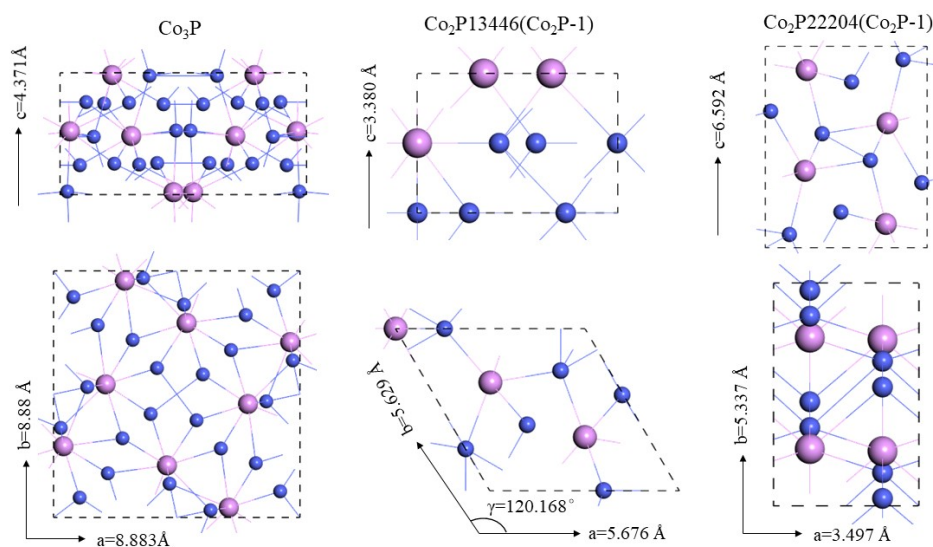

**Fig. S3** The optimized crystal structure and lattice parameter of the tetragonal Co<sub>3</sub>P, triclinic Co<sub>2</sub>P-1 and orthorhombic Co<sub>2</sub>P-2.

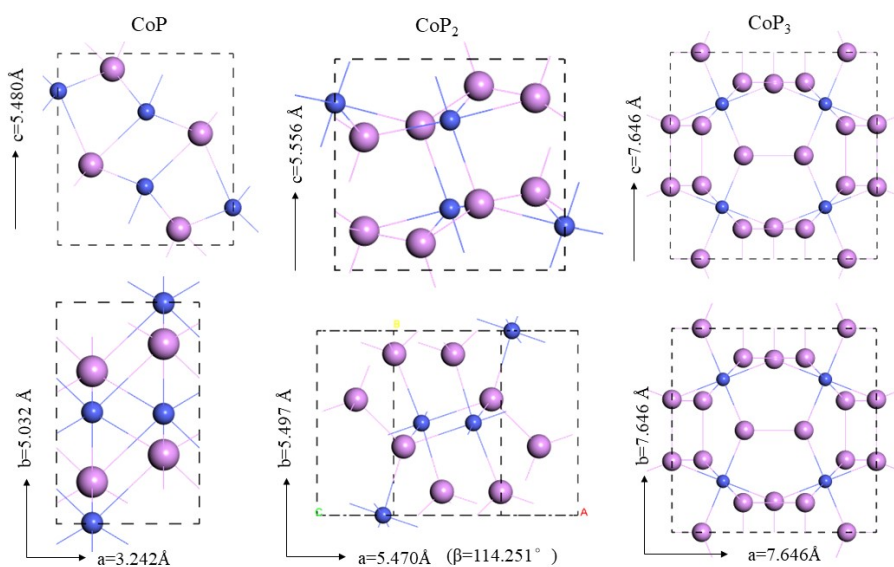

**Fig. S4** The optimized crystal structure and lattice parameter of the orthorhombic CoP, triclinic CoP<sub>2</sub> and cubic CoP<sub>3</sub>.

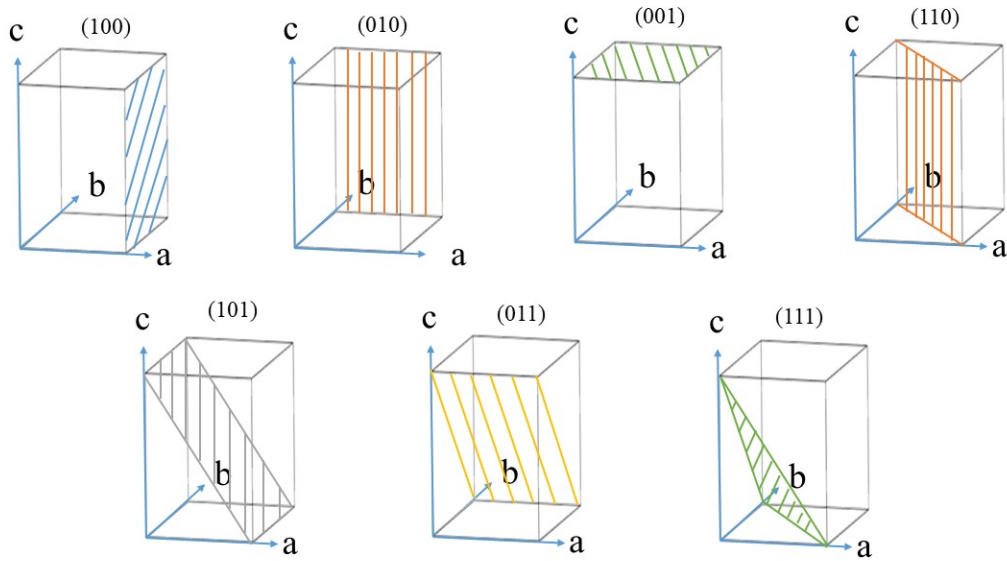

**Fig. S5** The overall surfaces considered in this paper, where the equivalent surfaces are put together. Base on the symmetry of orthogonal CoP, the following planes are equivalent: (100) and (-100); (010) and (0-10); (001) and (00-1); (110), (-1-10), (-110) and (1-10); (101), (-10-1), (-101) and (10-1); (011), (0-1-1), (0-11) and (01-1); (111), (-1-11), (1-1-1), (11-1), (-1-11), (1-11), (-11-1) and (-1-1-1). Accordingly, we only selected the (100), (010), (001), (110), (101), (011) and (111) surface during calculation.

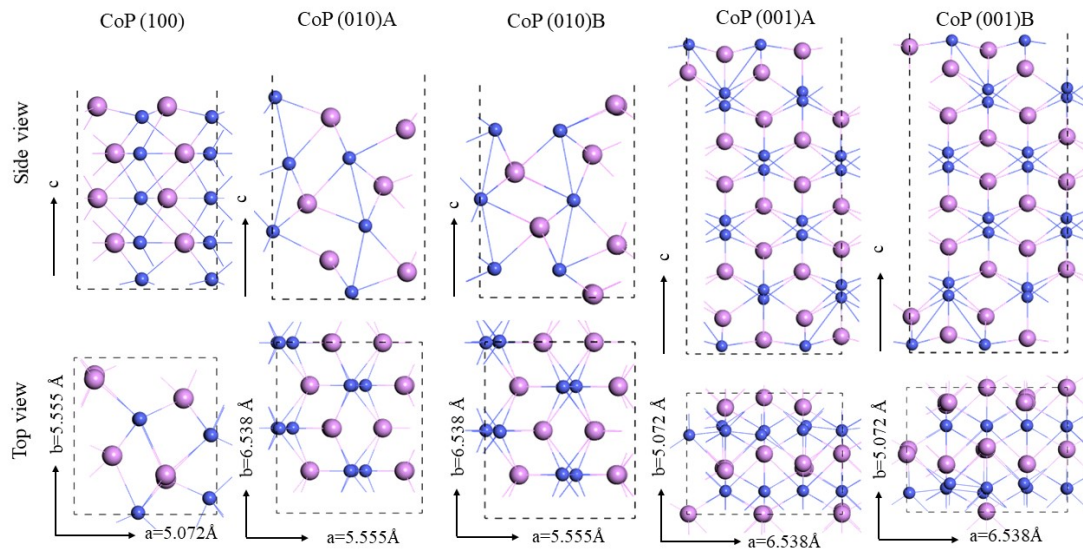

**Fig. S6** Surface structure and lattice parameter of low-index (001) surface for orthogonal CoP. Bi (purple) and O (bule) atoms are shown in colored spheres.

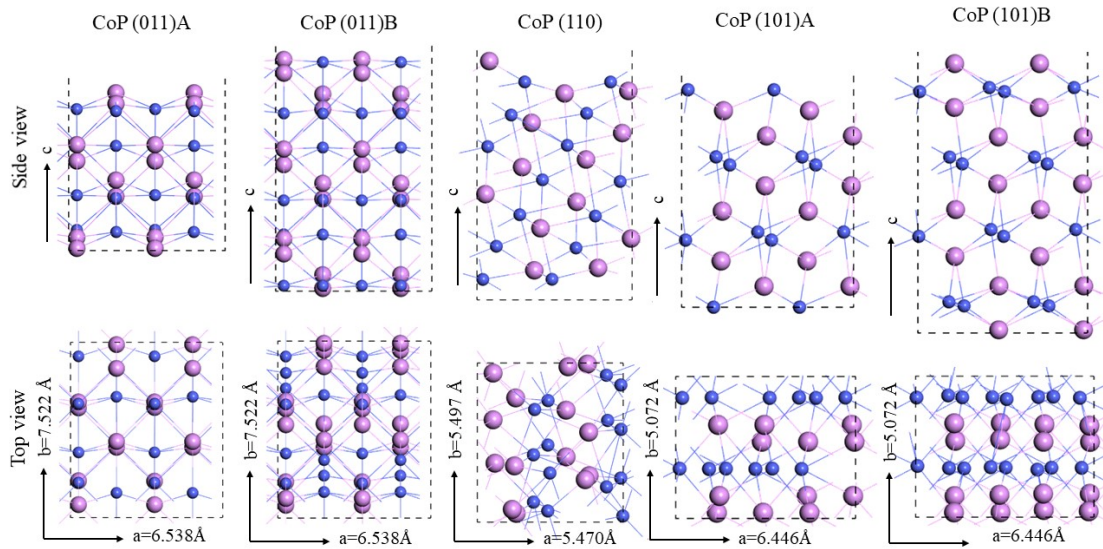

**Fig. S7** Surface structure and lattice parameter of low-index surface (101) for orthogonal CoP. Bi (purple) and O (blue) atoms are shown in colored spheres.

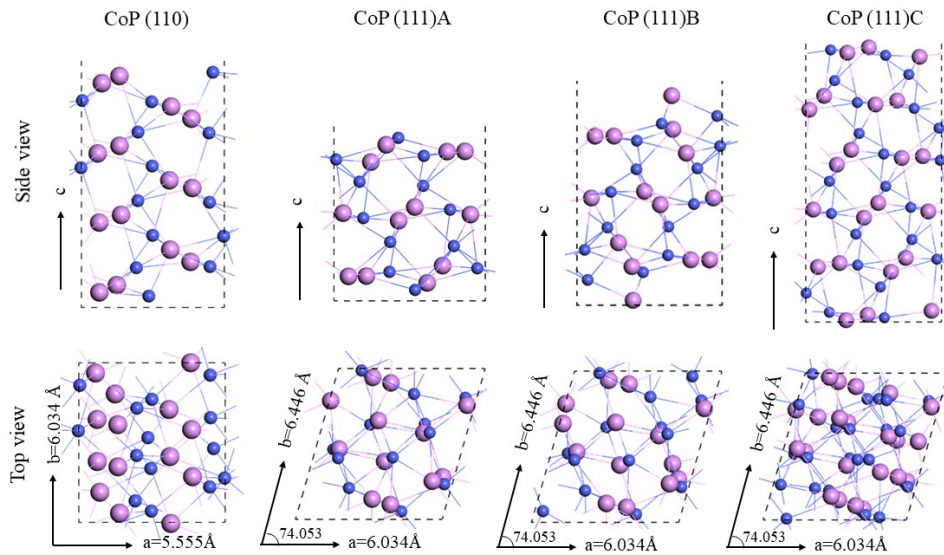

**Fig. S8** Surface structure and lattice parameter of low-index surface for orthogonal CoP. Bi (purple) and O (blue) atoms are shown in colored spheres.

All low-index surfaces of orthogonal CoP are shown in [Figure S6-S7](#), each low-index surface may contain several kinds of terminations, all facets are stoichiometric surfaces.

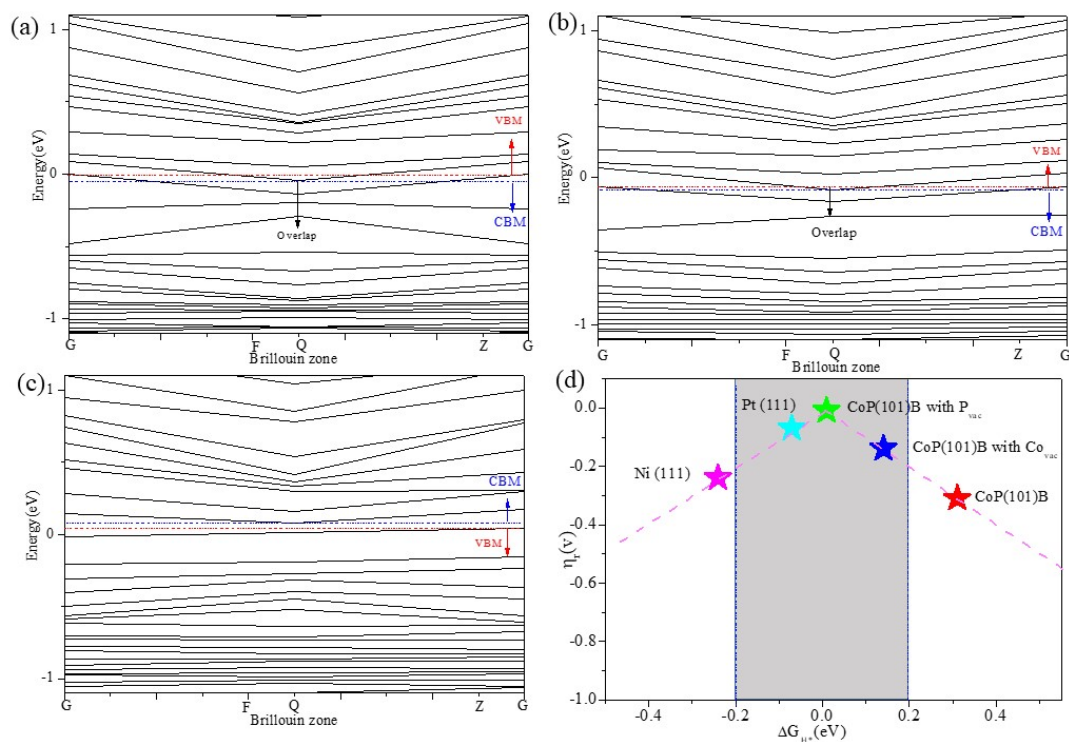

**Fig. S9** (a) Calculated band structure of CoP (101)B surface, (b) band structure of CoP (101)B surface with Co<sub>vac</sub>, (c) band structure of CoP (101)B surface with P<sub>vac</sub>. (d) Calculated HER volcano plot for perfect CoP (101)B surface, CoP (101)B surface with Co<sub>vac</sub> and P<sub>vac</sub>. The overpotential of CoP(101)B facet with P<sub>vac</sub> is lower than Pt (111), it is an ideal catalyst for hydrogen production from electrocatalytic water splitting.

S1 T. Liu, P. Li, N. Yao, et al. *Angewandte Chemie-international Edition*, 2019, **14**, 131.

S2 X. Huang, X. Xu, X. Luan, et al. *Nano Energy*, 2019, **68**, 104332.

S3 C. Tang, Z. Rong, W. Lu, et al. *Advanced Materials*, 2016, **2**, 29.

S4 X. Huang, X. Xu, X. Luan, et al. *Nano Energy*, 2019, **68**, 104332.
